# Supplementary material for: Introduction of nitrogen with controllable configuration into graphene via vacancies and edges
Source: Royal Society of Chemistry journal article supplement (doi:10.1039/c3ta13610h), 2013-01-01
Supplement: c3ta13610h.pdf [file c3ta13610h.pdf]

## Supporting Information

# Introduction of Nitrogen with Controllable Configuration into Graphene *via* Vacancies and Edges

*Bin Wang*<sup>1</sup>, *Leonidas Tsetseris*<sup>1,2</sup>, *Socrates T. Pantelides*<sup>1,3,4</sup>

<sup>1</sup> Department of Physics and Astronomy, Vanderbilt University, Nashville, Tennessee 37235

<sup>2</sup> Department of Physics, National Technical University of Athens, GB-15780 Athens, Greece

<sup>3</sup> Department of Electrical Engineering and Computer Science, Vanderbilt University, Nashville, Tennessee 37235

<sup>4</sup> Oak Ridge National Laboratory, Oak Ridge, Tennessee 37831

To whom the correspondence should be addressed. E-mail: [bin.wang@vanderbilt.edu](mailto:bin.wang@vanderbilt.edu)

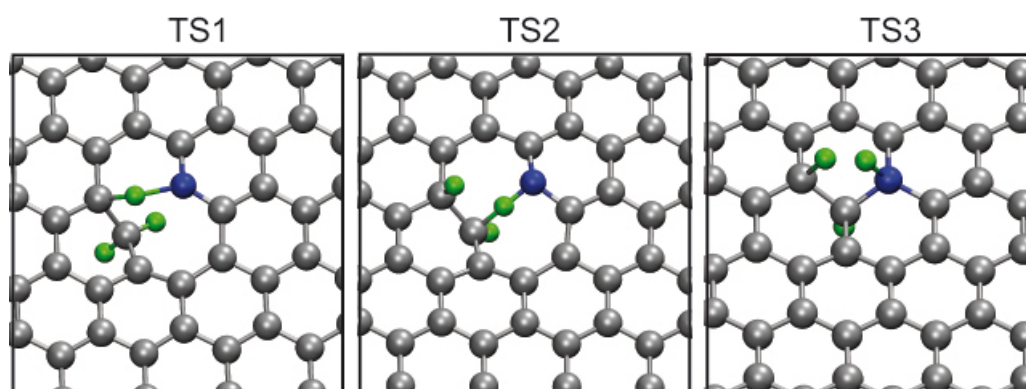

**Figure S1.** Transition states in the change of the configuration of nitrogen from NH-CH<sub>2</sub> to a graphitic-N at a single vacancy. The reaction path is shown in Figure 4 in the main text.

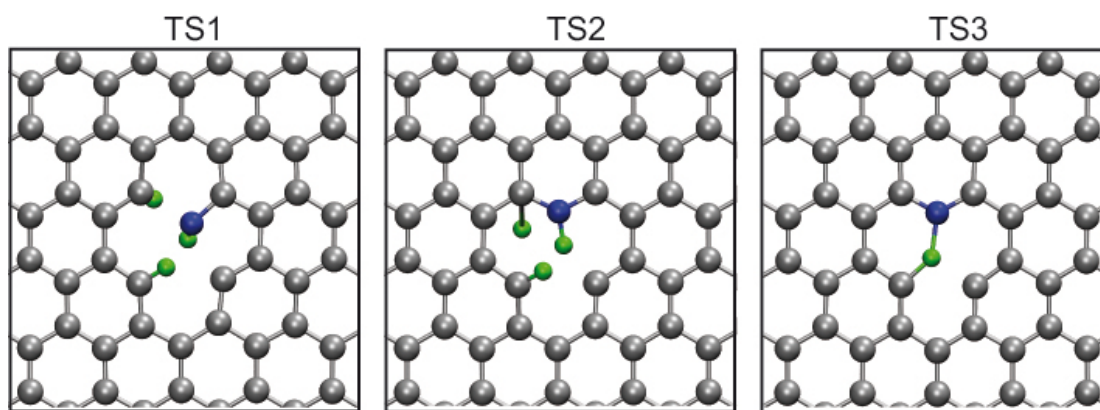

**Figure S2.** Transition states in the change of the nitrogen configuration from pyrrolic-N to pyridinic-N at a divacancy by desorption of a H<sub>2</sub> molecule. The reaction path is shown in Figure 6 in the main text.

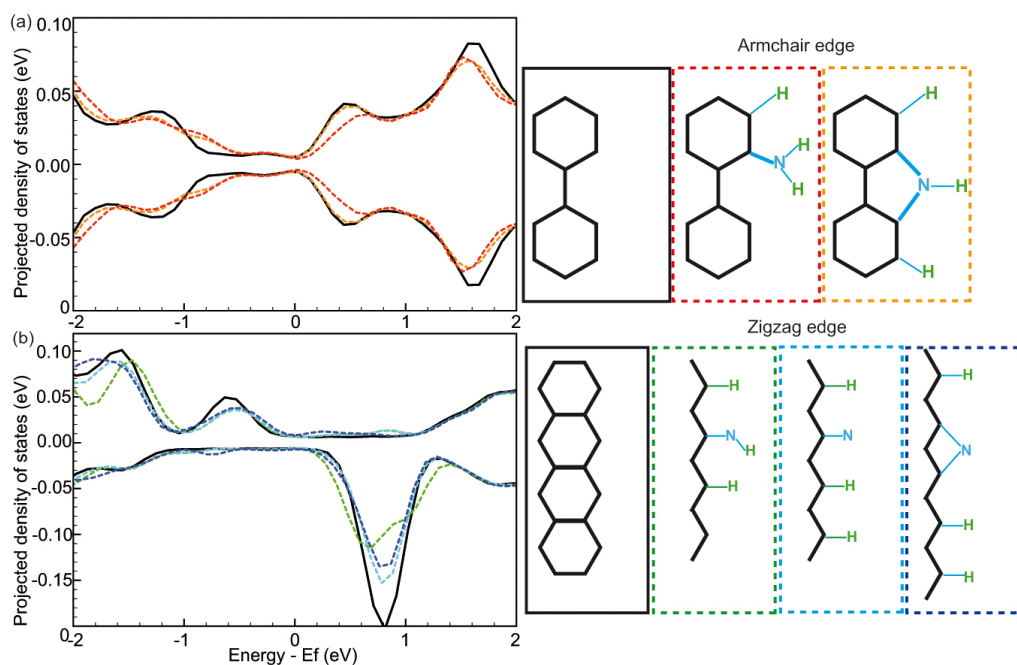

**Figure S3.** Projected density of states onto carbon atoms in N-doped graphene armchair ribbon (a) and zigzag ribbon (b). The different configurations are schematically shown on the right panel. At the armchair and zigzag edges, the covalent binding of nitrogen and hydrogen cause minor doping effect.
